# Supplementary material
Source: PubMed Central journal article supplement (PMC6426455)

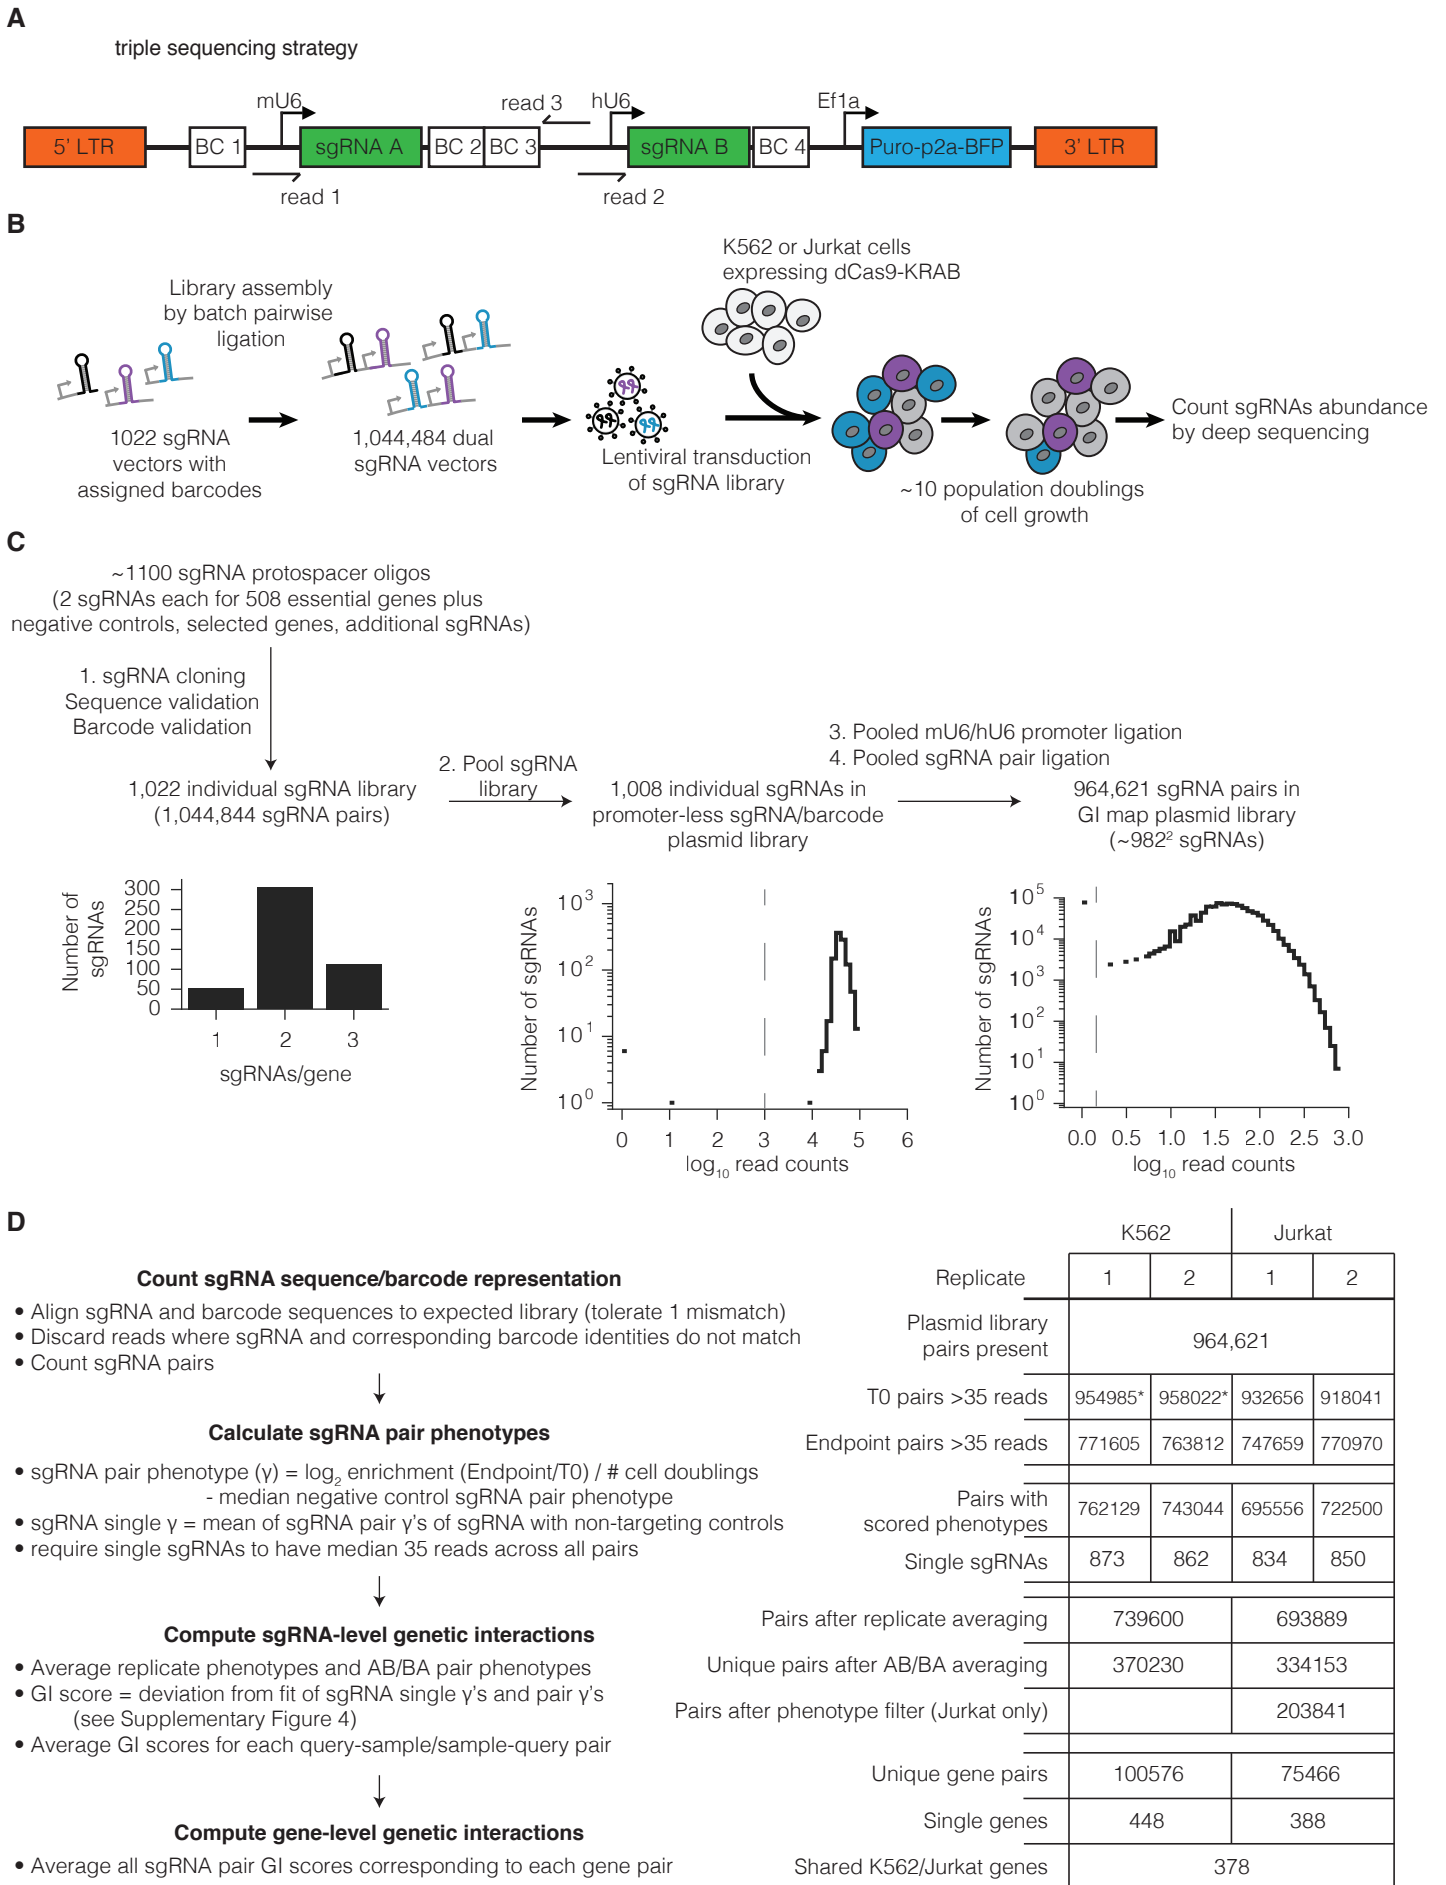

Supplement: NIHMS973971-supplement-1.pdf [file NIHMS973971-supplement-1.pdf]

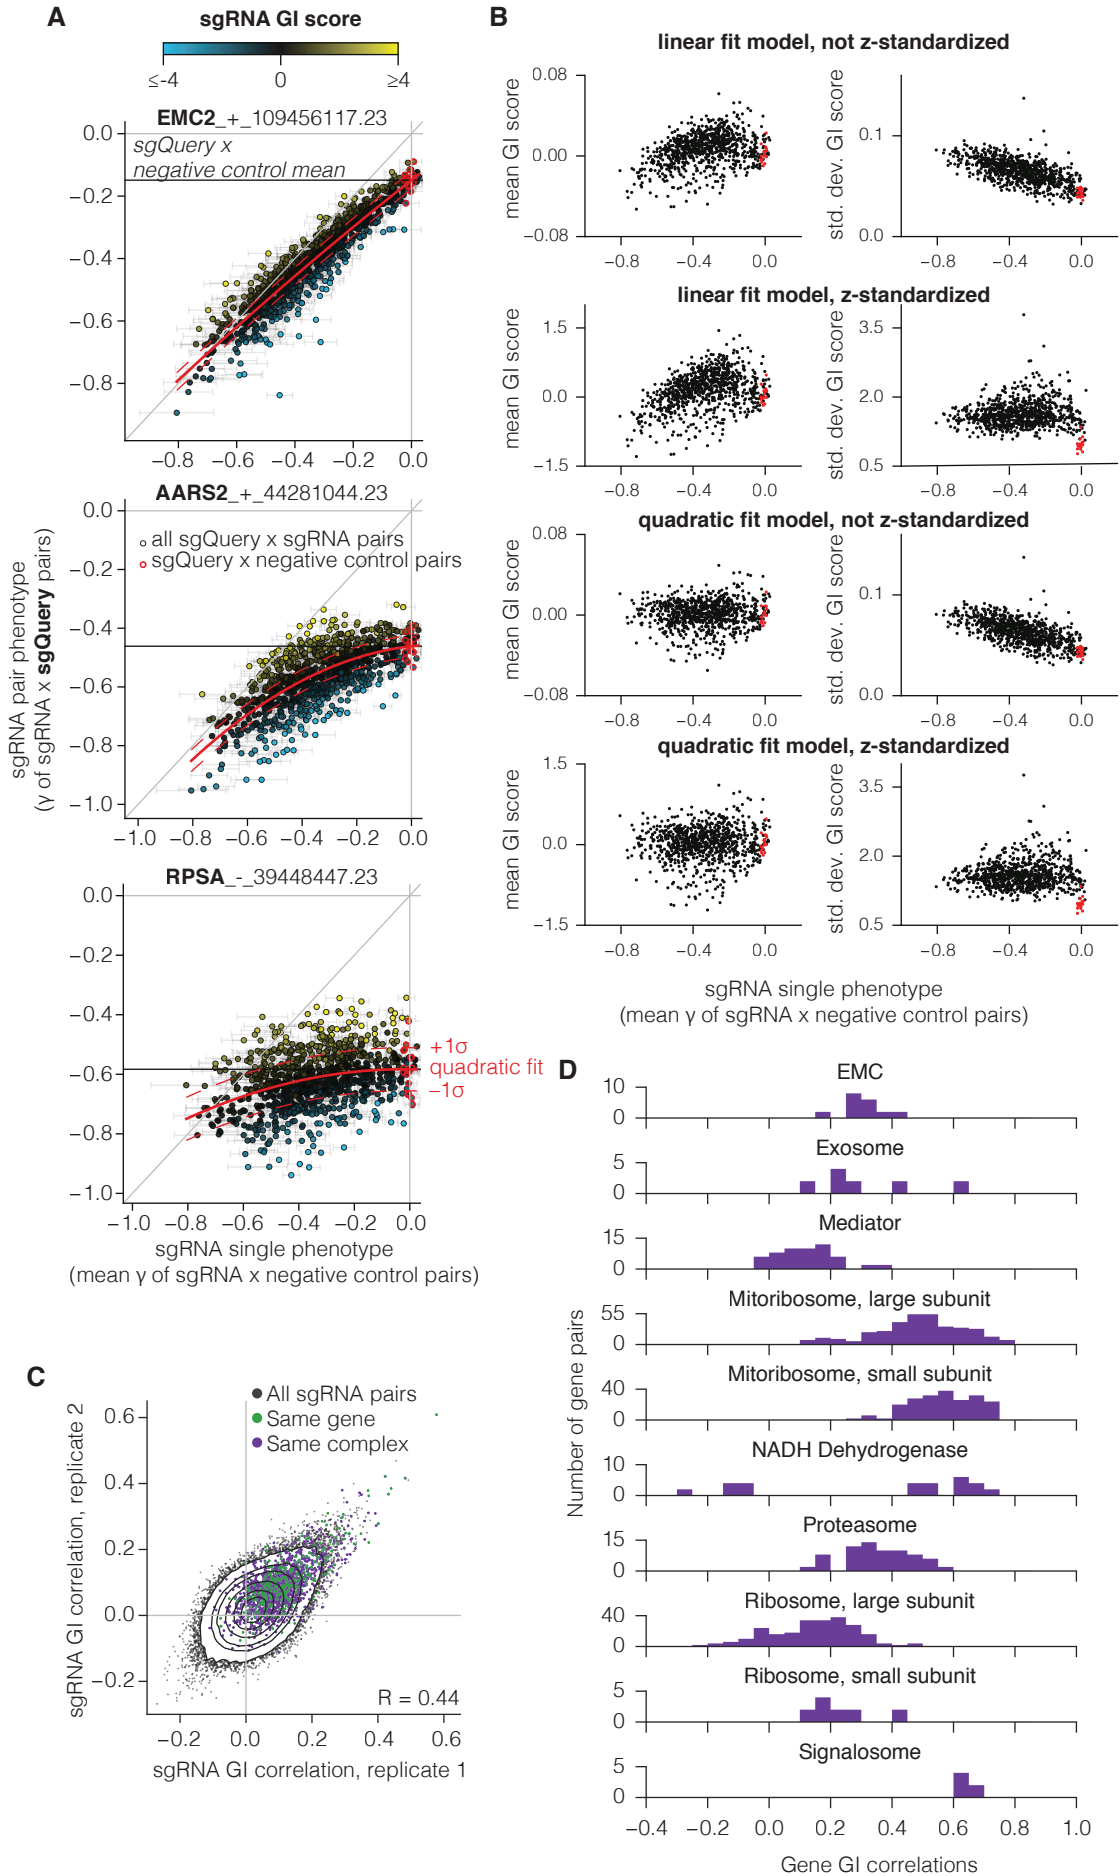

Supplement: NIHMS973971-supplement-3.pdf [file NIHMS973971-supplement-3.pdf]
